# Supplementary material for: Three-dimensional broadband ground-plane cloak made of metamaterials
Source: PubMed Central journal article supplement — Nat Commun. 2010 Jun 1;1(3):1–6. doi: 10.1038/ncomms1023 (PMC2982161; doi:10.1038/ncomms1023), 2010-06-01
Supplement: ncomms1023-s1.pdf [file ncomms1023-s1.pdf]

**Supplementary Information**

**Three-dimensional broadband ground-plane cloak  
made of metamaterials**

Hui Feng Ma\* & Tie Jun Cui\*

*State Key Laboratory of Millimetre Waves, School of Information Science and  
Engineering, Southeast University, Nanjing 210096, China*

*\*These authors contributed equally to this work. Correspondence and requests for  
materials should be addressed to T. J. C. (email: tjcui@seu.edu.cn).*

**The Supplementary Information includes: Supplementary Figures S1 to S7.**

## **Contents:**

**Fig. S1** The 3D ground-plane cloak and the corresponding index of refraction.

**Fig. S2** The fabrication process of the 3D ground-plane cloak.

**Fig. S3** The transformation of spherical waves excited by a point source to plane waves when propagating through a gradient-index lens.

**Fig. S4** The design of gradient-index lens antenna.

**Fig. S5** The relationship between the effective material parameters and the dimensions  $d$  of the CSR structure at 10 GHz.

**Fig. S6** The fabricated metamaterial lens antenna used in experiments.

**Fig. S7** The simulated electric-field distributions and measured radiation patterns of the metamaterial lens antenna.

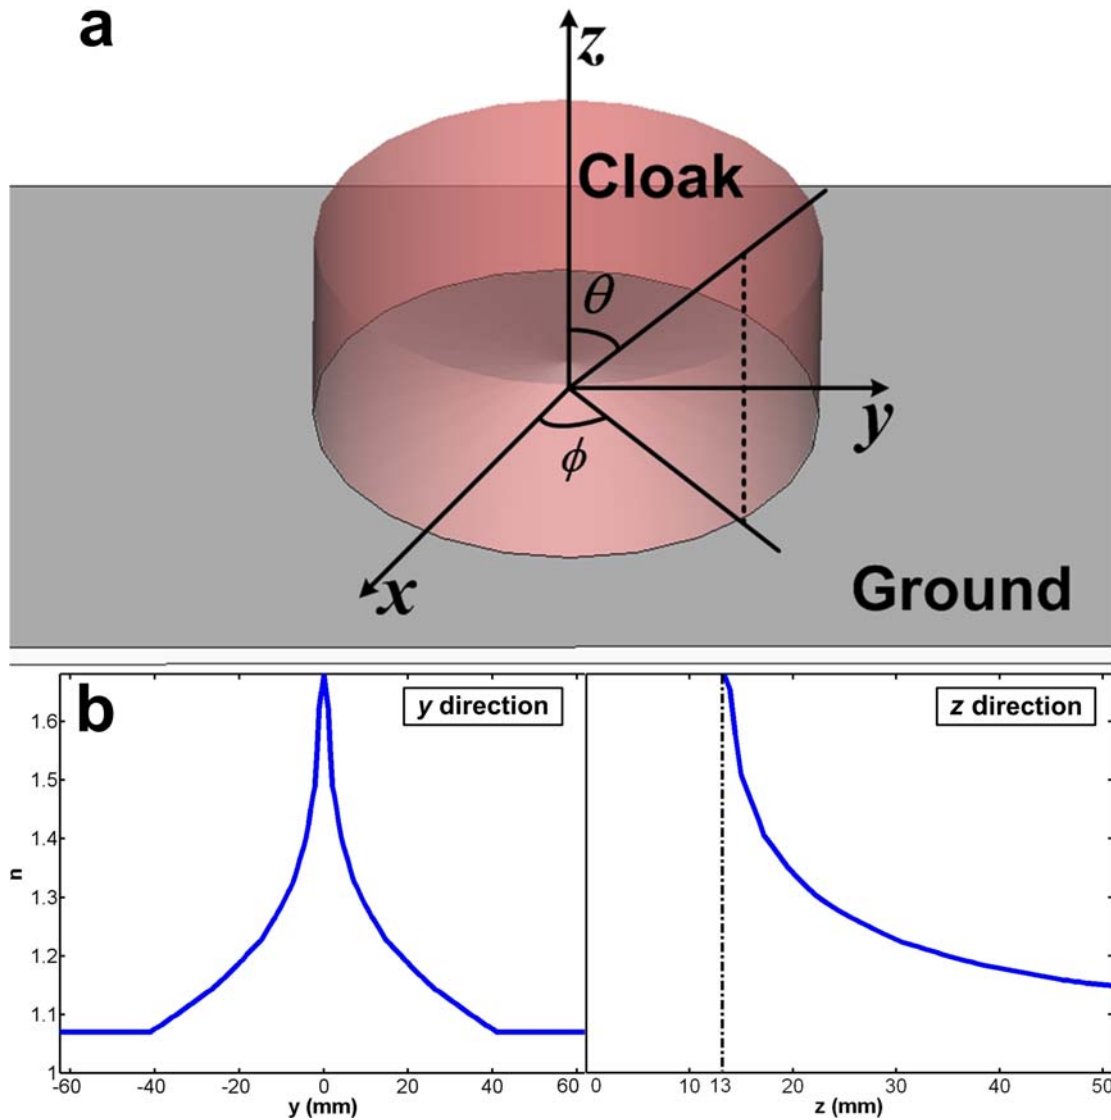

**Figure S1 | The 3D ground-plane cloak and the corresponding index of refraction. a,** The 3D ground-plane cloak in the Cartesian coordinate system. **b,** The distributions of refractive index along the  $y$  direction ( $x=0$  and  $z=13$  mm) and along the  $z$  direction ( $x=0$  and  $y=0$ ).

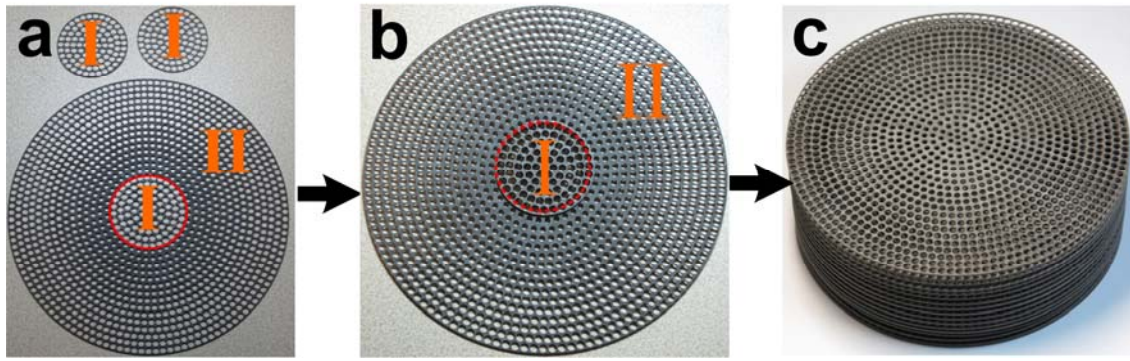

**Figure S2 | The fabrication process of the 3D ground-plane cloak.**

**a**, Three pieces of the F4B plates for the top layer. **b**, The generation of the top layer. **c**, The generation of the whole 3D ground-plane cloak.

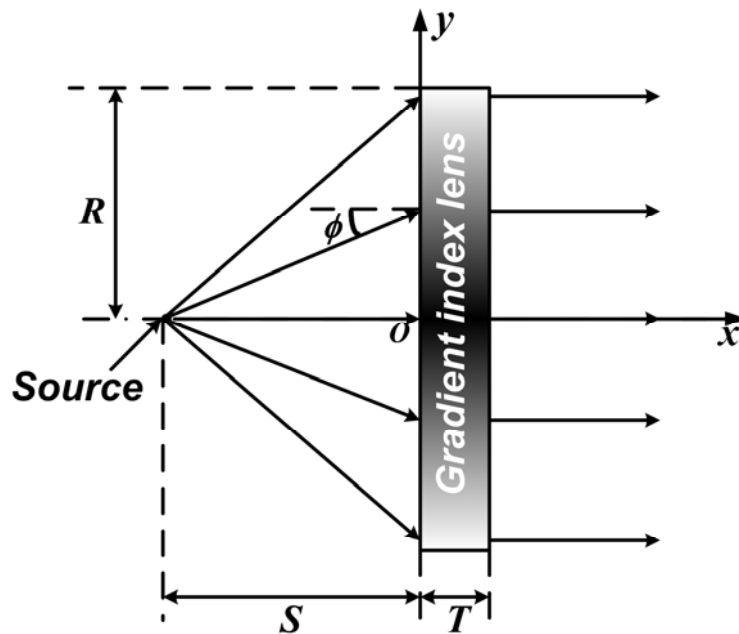

**Figure S3 | The transformation of spherical waves excited by a point source to plane waves when propagating through a gradient-index lens.**

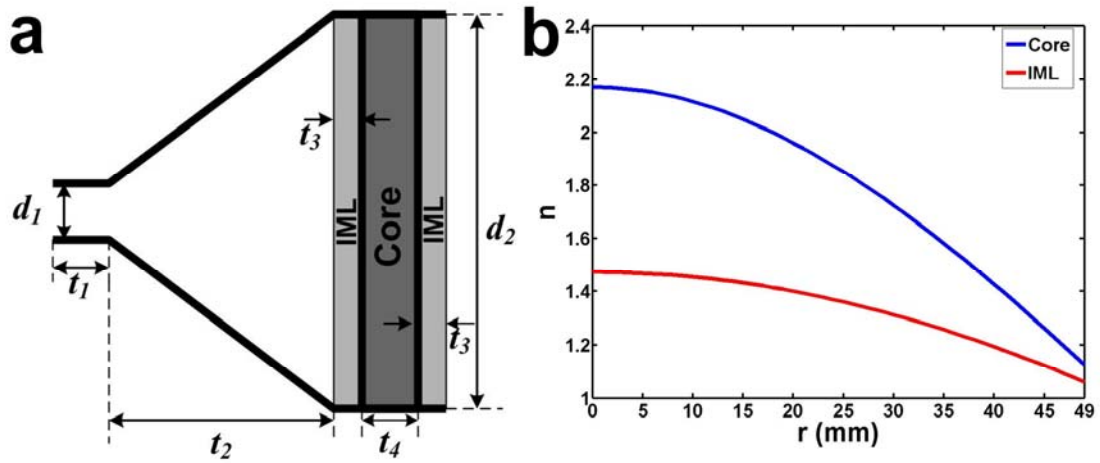

**Figure S4 | The design of gradient-index lens antenna. a,** The sketch of the gradient-index lens antenna, which is composed of a core layer and two IMLs. **b,** The refractive-index distributions of the core layer and IMLs.

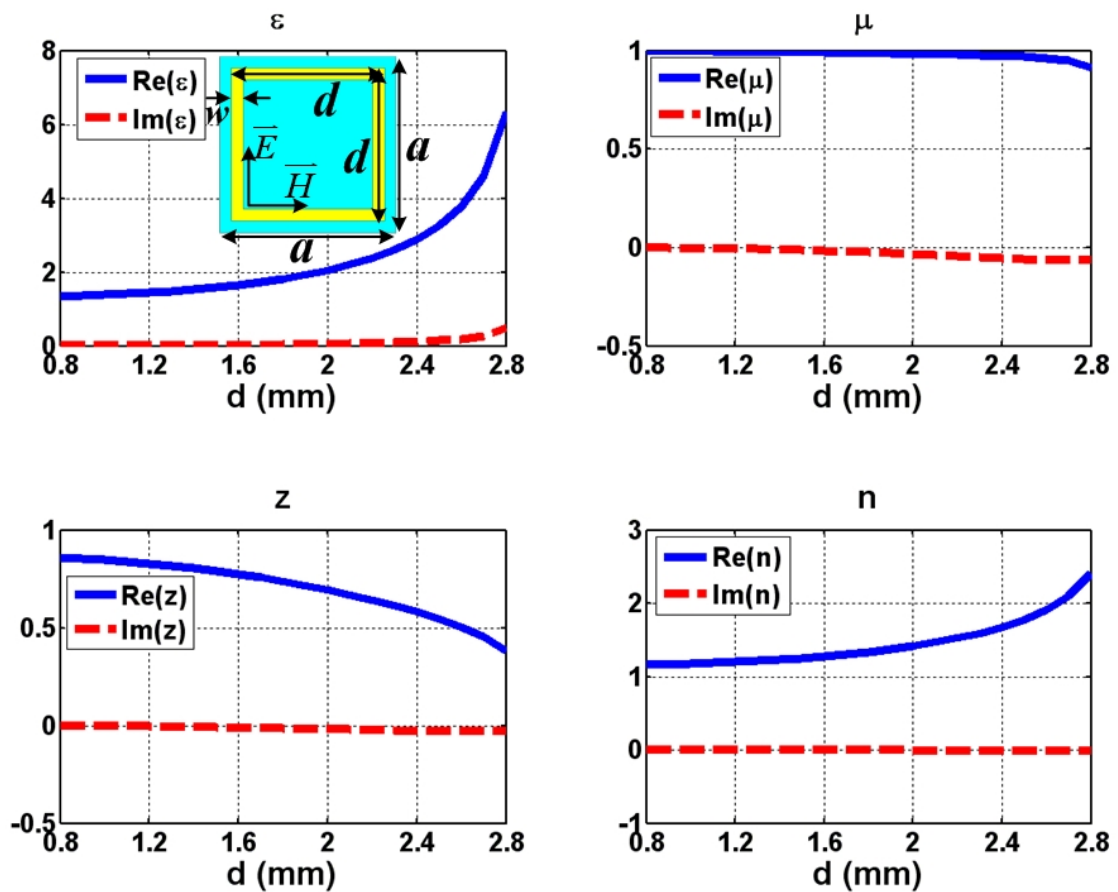

**Figure S5 | The relationship between the effective material parameters and the dimensions  $d$  of the CSR structure at 10 GHz.**

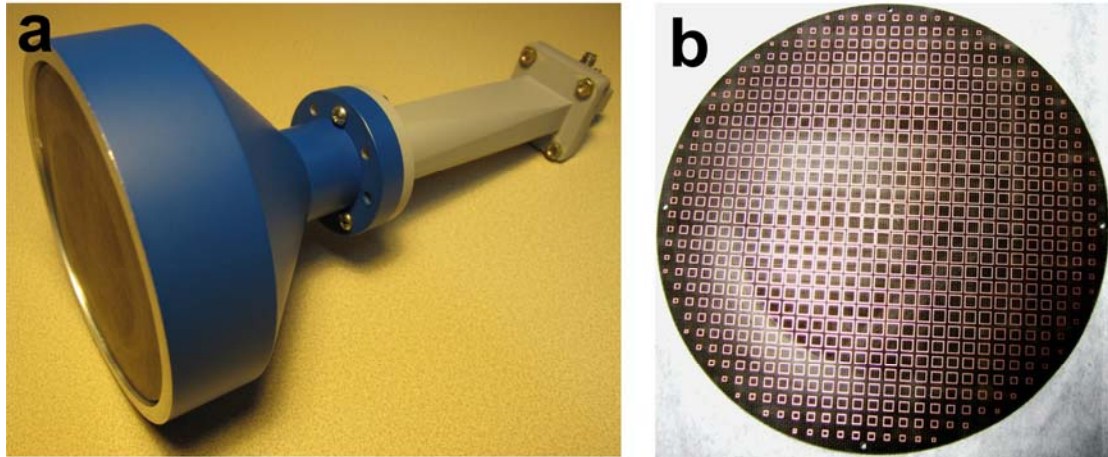

**Figure S6 | The fabricated metamaterial lens antenna used in experiments. a,** The photograph of the lens antenna. **b,** The photograph of the top layer of the lens antenna.

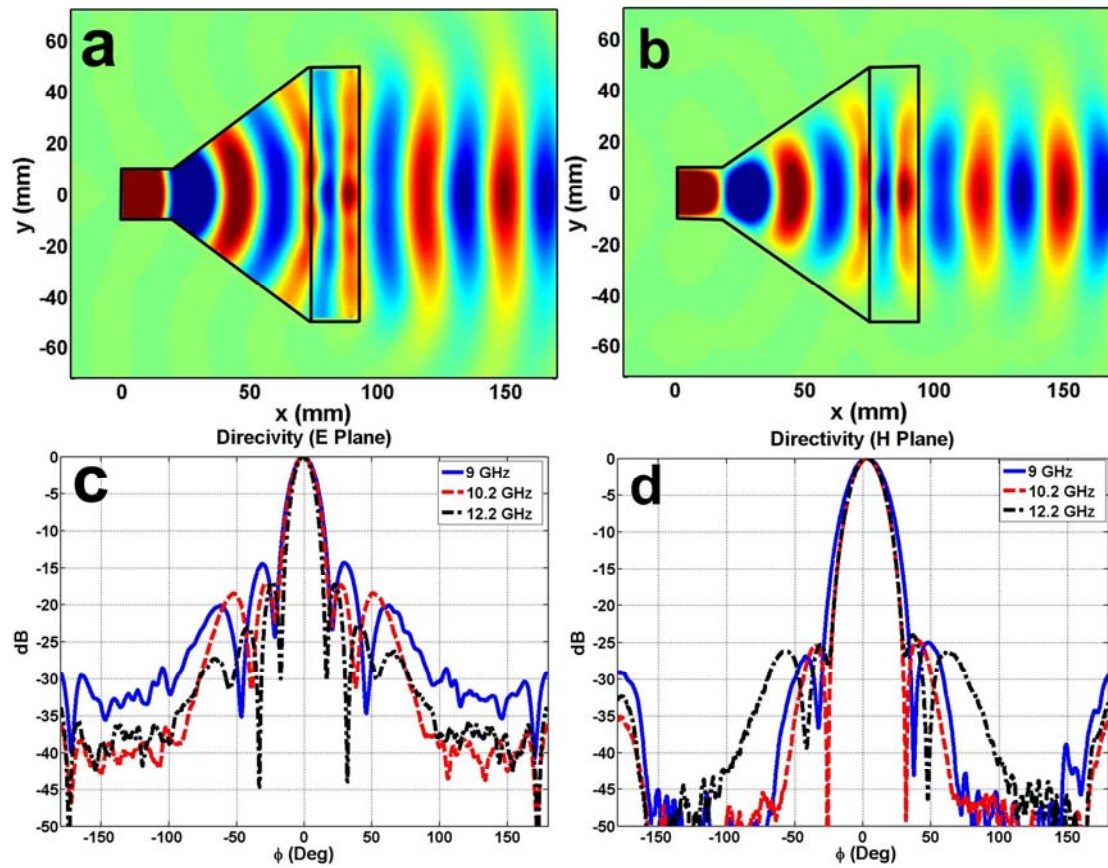

**Figure S7 | The simulated electric-field distributions and measured radiation patterns of the metamaterial lens antenna. a,** The simulated electric-field distribution on the E plane. **b,** The simulated electric-field distribution on the H plane. **c,** The measured far-field radiation patterns on the E plane. **d,** The measured far-field radiation patterns on the H plane.
